# Supplementary material
Source: ML conference proceedings conference paper supplement (https://openreview.net/forum?id=jRi824qGpS)
Supplement: supplementary_material [file StarDojo_Lite.xlsx]

## Sheet: Crafting
Name	ID	Object	Quantity	Tool	Save	Init Commands	Evaluator	Difficulty
craft_1_cherry_bomb	0	Cherry Bomb	1		save_new	set_time(time=900)	craft	medium
craft_1_wood_fence	1	Wood Fence	1		save_new		craft	easy
craft_1_sprinkler	2	Sprinkler	1		save_new	add_item_by_name("Furnace"), add_item_by_name("Copper Ore", 5), add_item_by_name("Iron Ore", 5), add_item_by_name("Coal", 2)	craft	medium
craft_1_basic_retaining_soil	3	Basic Retaining Soil	1		save_new		craft	easy
craft_1_spring_seeds	4	Spring Seeds	1		save_new		craft	hard
craft_1_field_snack	5	Field Snack	1		save_new	add_item_by_name("Acorn"), add_item_by_name("Maple Seed"), add_item_by_name("Pine Cone")	craft	easy
craft_1_torch	6	Torch	1		save_new		craft	easy
craft_1_furnace	7	Furnace	1		save_new	set_time(time=900)	craft	medium
craft_1_chest	8	Chest	1		save_new	set_time(time=900)	craft	medium
craft_1_scarecrow	9	Scarecrow	1		save_new	add_item_by_name("Wood", 50), add_item_by_name("Coal"), add_item_by_name("Fiber", 20)	craft	easy
produce_1_copper_bar_with_furnace	10	Copper Bar	1	Furnace	save_new	add_item_by_name("Furnace"), add_item_by_name("Copper Ore", 5), add_item_by_name("Coal")	craft	easy
produce_1_refined_quartz_with_furnace	11	Refined Quartz	1	Furnace	save_new		craft	hard
cook_1_fried_egg_with_stove	12	Fried Egg	1	Stove	save_new	upgrade_house(1), add_item_by_name("Egg")	craft	easy
cook_1_salad_with_cookout_kit	13	Salad	1	Cookout Kit	save_new		craft	hard

## Sheet: Exploration
Name	ID	Object	Quantity	Tool	Save	Init Commands	Evaluator	Difficulty
go_to_bed	0	Bed	1		save_new		sleep	easy
go_to_coop	1	Coop	1		save_new		location	easy
go_to_bus_stop	2	BusStop	1		save_new		location	easy
go_to_backwoods	3	Backwoods	1		save_new		location	easy
go_to_pierre's_general_store	4	SeedShop	1		save_new	set_time(time=900)	location	easy
go_to_marnie's_ranch	5	AnimalShop	1		save_new	set_time(time=900)	location	easy
go_to_fish_shop	6	FishShop	1		save_new	set_time(time=900)	location	easy
go_to_carpenter's_shop	7	ScienceHouse	1		save_new	set_time(time=900)	location	easy
go_to_the_mines_2nd_floor	8	UndergroundMine2	1		save_new		location	medium
go_to_the_mines_5th_floor_by_elevator	9	UndergroundMine5	1	Elevator	save_new		location	medium
go_to_the_mines_10th_floor	10	UndergroundMine10	1		save_new		location	hard
chop_10_wood_with_axe	11	Wood	10	Axe	save_new		harvest	easy
chop_20_wood_with_axe	12	Wood	20	Axe	save_new		harvest	medium
forage_1_wild_horseradish	13	Wild Horseradish	1		save_new	warp("forest")	harvest	medium
forage_1_daffodil	14	Daffodil	1		save_new	warp("town")	harvest	medium
forage_1_leek	15	Leek	1		save_new	warp("mountain")	harvest	medium
forage_1_clam	16	Clam	1		save_new	warp("beach")	harvest	easy
forage_10_hay_with_scythe	17	Hay	10	Scythe	save_new		silo	easy
forage_1_quartz	18	Quartz	1		save_new	warp_mine(1)	harvest	medium
dig_1_cave_carrot_with_hoe	19	Cave Carrot	1	Hoe	save_new	warp_mine(13)	harvest	easy
mine_1_amethyst_with_pickaxe	20	Amethyst	1	Pickaxe	save_new	warp_mine(1)	harvest	hard
mine_1_copper_ore_with_pickaxe	21	Copper Ore	1	Pickaxe	save_new	warp_mine(2)	harvest	easy
mine_1_coal_with_pickaxe	22	Coal	1	Pickaxe	save_new	warp_mine(1)	harvest	medium
quit_1_quest	23	Quest	1		save_new		quit	easy
take_1_quest_reward	24	Quest Reward	1		save_quests		reward	easy
complete_1_help_wanted_quest	25	Help Wanted Quest	1		save_new		complete_help	hard
complete_the_story_quest_"introductions"	26	9	1		save_new		complete_story	hard
complete_the_story_quest_"getting_started"	27	6	1		save_quests		complete_story	hard

## Sheet: Farming
Name	ID	Object	Quantity	Tool	Save	Init Commands	Evaluator	Difficulty
clear_10_weeds_with_scythe	0	Weeds	10	Scythe	save_new		clear	easy
clear_5_stone_with_pickaxe	1	Stone	5	Pickaxe	save_new		clear	easy
clear_30_debris_with_scythe_and_pickaxe_and_axe	2	Debris	30	Scythe, Pickaxe, Axe	save_new		clear	medium
till_5_tile_with_hoe	3	Tile	5	Hoe	save_new		till	easy
fertilize_5_dirt_with_basic_retaining_soil	4	Dirt	5	Basic Retaining Soil	save_farming	add_item_by_name("Basic Retaining Soil", 5)	fertilize	easy
fertilize_1_dirt_with_speed_gro	5	Dirt	1	Speed-Gro	save_farming		fertilize	easy
sow_5_dirt_with_cauliflower_seeds	6	Dirt	5	Cauliflower Seeds	save_farming	add_item_by_name("Cauliflower Seeds", 5)	sow	easy
sow_1_dirt_with_potato_seeds	7	Dirt	1	Potato Seeds	save_new	set_time(time=900)	sow	medium
water_5_crop_with_watering_can	8	Crop	5	Watering Can	save_farming		water	easy
harvest_5_parsnip	9	Parsnip	5		save_farming		harvest	easy
cultivate_and_harvest_1_garlic	10	Garlic	1		save_new	add_item_by_name("Garlic Seeds")	harvest	hard
pet_3_animal	11	Animal	3		save_farming		pet	easy
pet_8_animal	12	Animal	8		save_farming		pet	medium
open_1_deluxe_coop	13	Deluxe Coop	1		save_farming		open	easy
fill_1_pet_bowl_with_watering_can	14	Pet Bowl	1	Watering Can	save_new		fill	easy
fill_1_feeding_bench_with_hay	15	Feeding Bench	1	Hay	save_farming	add_item_by_name("Hay", 12)	fill	easy
harvest_1_egg	16	Egg	1		save_farming		harvest	easy
harvest_1_milk_with_milk_pail	17	Milk	1	Milk Pail	save_farming	add_item_by_name("Milk Pail")	harvest	easy
harvest_3_milk_with_milk_pail	18	Milk	3	Milk Pail	save_farming		harvest	hard
incubate_1_chicken_with_incubator	19	Chicken	1	Incubator	save_farming		incubate	hard
earn_50_friendship_with_1_cat	20	Cat	50		save_new		friendship	hard

## Sheet: Social
Name	ID	Object	Quantity	Tool	Save	Init Commands	Evaluator	Difficulty
ship_1_parsnip_with_shipping_bin	0	Parsnip	1	Shipping Bin	save_new	add_item_by_name("Parsnip")	sell	easy
purchase_5_beer	1	Beer	5		save_new	warp_shop("gus")	purchase	easy
purchase_1_muscle_remedy	2	Muscle Remedy	1		save_new	set_time(time=900)	purchase	medium
sell_5_parsnip_to_pierre	3	Parsnip	5		save_new	warp_shop("pierre"), add_item_by_name("Parsnip", 5)	sell	easy
sell_1_parsnip_to_pierre	4	Parsnip	1		save_new	add_item_by_name("Parsnip"), set_time(time=900)	sell	medium
upgrade_to_copper_pickaxe	5	Copper Pickaxe	1		save_new	add_item_by_name("Copper Bar", 5)	upgrade_tool	hard
break_5_geode	6	Geode	5		save_new	warp_shop("clint"), add_item_by_name("Geode", 5)	break	easy
purchase_joja_membership	7	Joja Membership	1		save_new	warp("joja", 21, 26)	jojamart	easy
purchase_minecarts_development_project	8	Minecarts Repaired	1		save_new	joja_membership(), set_time(time=900)	jojamart	medium
upgrade_to_large_pack	9	Large Pack	1		save_new	warp_shop("pierre")	backpack	easy
purchase_1_chicken	10	Chicken	1		save_new	warp_shop("marnie")	purchase_animal	easy
sell_1_chicken	11	Chicken	1		save_new		sell_animal	easy
build_1_big_coop	12	Big Coop	1		save_new	warp_shop("robin"), add_item_by_name("Wood", 400), add_item_by_name("Stone", 150)	build	easy
move_1_coop	13	Coop	1		save_new	set_time(time=900)	move	medium
upgrade_farmhouse	14	Farmhouse	1		save_new	warp_shop("robin"), add_item_by_name("Wood", 450)	upgrade_farmhouse	easy
demolish_1_shipping_bin	15	Shipping Bin	1		save_new	set_time(time=900)	demolish	medium
talk_to_alex	16	Alex	1		save_new	set_time(time=800)	talk	easy
talk_to_sebastian	17	Sebastian	1		save_new	set_time(time=1500)	talk	easy
talk_to_vincent	18	Vincent	1		save_new	set_time(time=900)	talk	easy
give_abigail_1_amethyst	19	Abigail	1	Amethyst	save_new	add_item_by_name("Amethyst", 1, 4), set_time(time=900)	gift	easy
give_haley_1_coconut	20	Haley	1	Coconut	save_new	add_item_by_name("Coconut", 1, 4), set_time(time=1100)	gift	easy
give_jas_1_fairy_rose	21	Jas	1	Fairy Rose	save_new	add_item_by_name("Fairy Rose", 1, 4), set_time(time=900)	gift	easy
give_jodi_1_pancakes	22	Jodi	1	Pancakes	save_new	add_item_by_name("Pancakes", 1, 4), set_time(time=900)	gift	easy
earn_100_friendship_with_elliott	23	Elliott	100		save_new	add_item_by_name("Pomegranate", 1, 4), set_time(time=1100)	friendship	medium
earn_200_friendship_with_harvey	24	Harvey	200		save_new		friendship	hard

## Sheet: Combat
Name	ID	Object	Quantity	Tool	Save	Init Commands	Evaluator	Difficulty
kill_1_green_slime_with_rusty_sword	0	Green Slime	1	Rusty Sword	save_new	warp_mine(2)	kill	easy
kill_5_green_slime_with_rusty_sword	1	Green Slime	5	Rusty Sword	save_new	warp_mine(2)	kill	medium
kill_10_green_slime_with_rusty_sword	2	Green Slime	10	Rusty Sword	save_new	warp_mine(2)	kill	hard
kill_1_bug_with_rusty_sword	3	Bug	1	Rusty Sword	save_new	warp_mine(2)	kill	easy
kill_5_bug_with_rusty_sword	4	Bug	5	Rusty Sword	save_new	warp_mine(2)	kill	medium
kill_10_bug_with_rusty_sword	5	Bug	10	Rusty Sword	save_new	warp_mine(2)	kill	hard
kill_1_fly_with_rusty_sword	6	Fly	1	Rusty Sword	save_new	warp_mine(2)	kill	medium
kill_1_duggy_with_rusty_sword	7	Duggy	1	Rusty Sword	save_new	warp_mine(6)	kill	medium
kill_1_grub_with_rusty_sword	8	Grub	1	Rusty Sword	save_new	warp_mine(15)	kill	easy
kill_5_grub_with_rusty_sword	9	Grub	5	Rusty Sword	save_new	warp_mine(15)	kill	medium
kill_10_grub_with_rusty_sword	10	Grub	10	Rusty Sword	save_new	warp_mine(15)	kill	hard
kill_1_rock_crab_with_rusty_sword	11	Rock Crab	1	Rusty Sword	save_new	warp_mine(2)	kill	medium
